# Supplementary material for: Tailoring the structure and self-activated photoluminescence of carbonated amorphous calcium phosphate nanoparticles for bioimaging applications
Source: Royal Society of Chemistry journal article supplement (doi:10.1039/d3tb02915h), 2024-01-01
Supplement: d3tb02915h1.pdf [file d3tb02915h1.pdf]

## ELECTRONIC SUPPLEMENTARY INFORMATION

### **Tailoring the Structure and Self-Activated Photoluminescence of Carbonated Amorphous Calcium Phosphate Nanoparticles for Bioimaging Applications**

Thales R. Machado,<sup>a,\*</sup> Carlos E. Zanardo,<sup>a</sup> Raquel R.C. Vilela,<sup>a</sup> Renata R. Miranda,<sup>a</sup> Natália S. Moreno,<sup>a</sup> Celisnolia M. Leite,<sup>a</sup> Elson Longo,<sup>b</sup> and Valtencir Zucolotto<sup>a,\*</sup>

<sup>a</sup> GNANO - Nanomedicine and Nanotoxicology Group, Physics Institute of São Carlos, University of São Paulo, 13566-590 São Carlos, SP, Brazil.

<sup>b</sup> CDMF - Center for the Development of Functional Materials, Federal University of São Carlos, 13565-905 São Carlos, SP, Brazil.

\*Corresponding author: [trmachado@ifsc.usp.br](mailto:trmachado@ifsc.usp.br) (T.R. Machado)

[zuco@ifsc.usp.br](mailto:zuco@ifsc.usp.br) (V. Zucolotto)

**Table S1.** ACP samples prepared by chemical precipitation and initial amounts of the precursors.

| Samples | nCa <sup>2+</sup><br>(mmol) | nPO <sub>4</sub> <sup>3-</sup><br>(mmol) | nCO <sub>3</sub> <sup>2-</sup><br>(mmol) | CO <sub>3</sub> <sup>2-</sup> /PO <sub>4</sub> <sup>3-</sup><br>molar ratio |
|---------|-----------------------------|------------------------------------------|------------------------------------------|-----------------------------------------------------------------------------|
| ACP1    | 9                           | 6                                        | -                                        | -                                                                           |
| ACP2    | 9                           | 6                                        | 0.375                                    | 0.0625                                                                      |
| ACP3    | 9                           | 6                                        | 0.75                                     | 0.125                                                                       |
| ACP4    | 9                           | 6                                        | 1.5                                      | 0.25                                                                        |
| ACP5    | 9                           | 6                                        | 3                                        | 0.5                                                                         |
| ACP6    | 9                           | 6                                        | 6                                        | 1                                                                           |
| ACP7    | 9                           | 6                                        | 12                                       | 2                                                                           |
| ACP8    | 9                           | 6                                        | 24                                       | 4                                                                           |

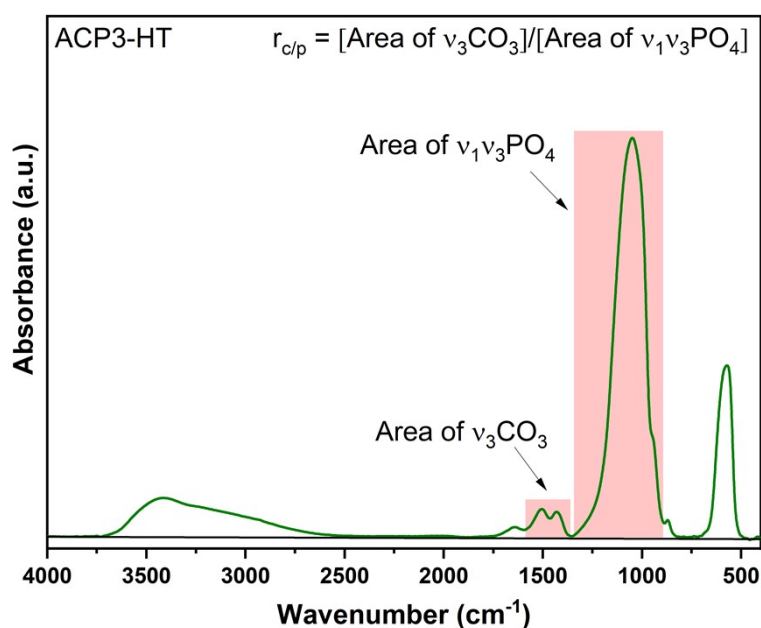

**Fig. S1.** The carbonate weight percentage ( $w(\text{CO}_3)$ ) was determined using the methodology developed by Grunenwald et al. [1], which utilizes FTIR spectroscopy for accurate carbonation analysis in CaP samples including HA and ACP [2,3]. As shown in this figure for ACP3-HT sample, the  $w(\text{CO}_3)$  was calculated by estimating the ratio  $r_{c/p}$  between the integrated areas of the observed  $\nu_3\text{CO}_3$  bands at  $\sim 1590\text{-}1350\text{ cm}^{-1}$  and  $\nu_1, \nu_3\text{PO}_4$  bands at  $\sim 1300\text{-}900\text{ cm}^{-1}$  after conducting a baseline correction and normalization to the  $\nu_3\text{PO}_4$  mode with the highest absorbance value. Subsequently, the obtained  $r_{c/p}$  values were used in the equation  $w(\text{CO}_3) = 28.62 * r_{c/p} + 0.0843$  to determine the overall degree of carbonation.

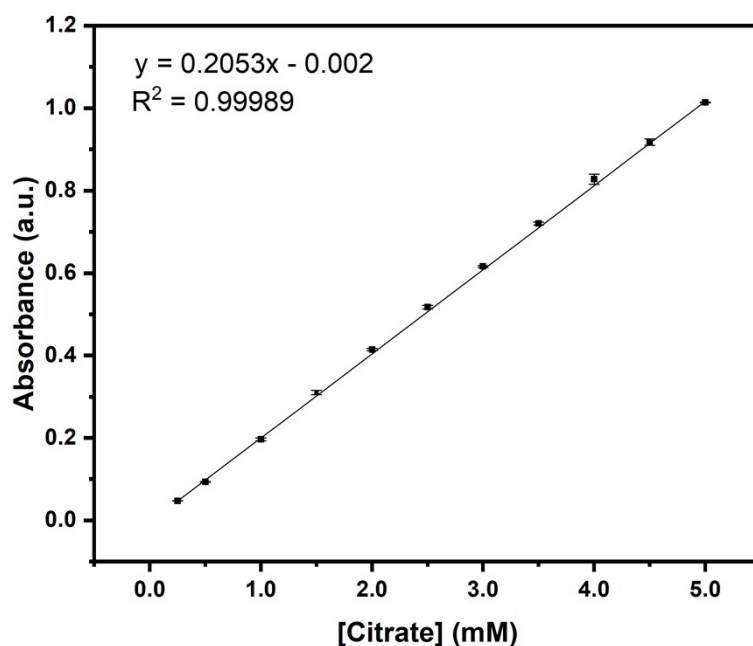

**Fig. S2.** Standard curve generated from absorbance values at 210 nm, corresponding to the absorption of citrate ions.

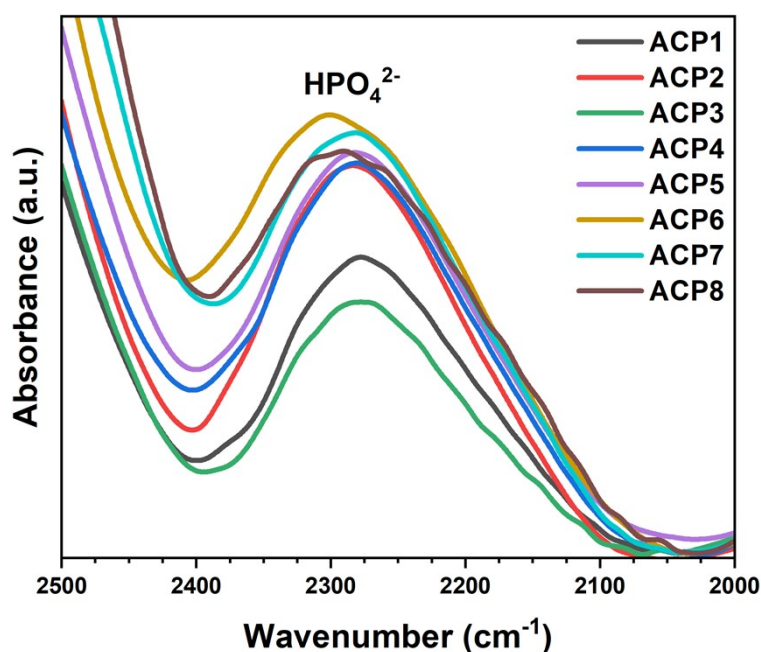

**Fig. S3.** FTIR spectra evidencing a band between 2500-2100 cm<sup>-1</sup> attributed to the presence of HPO<sub>4</sub><sup>2-</sup> in as-synthesized samples [4,5].

**Table S2.** wCO<sub>3</sub> estimated by elemental analysis of two representative samples.

| Sample | wCO <sub>3</sub> (wt.%) |
|--------|-------------------------|
| ACP3   | 2.87                    |
| ACP8   | 27.01                   |

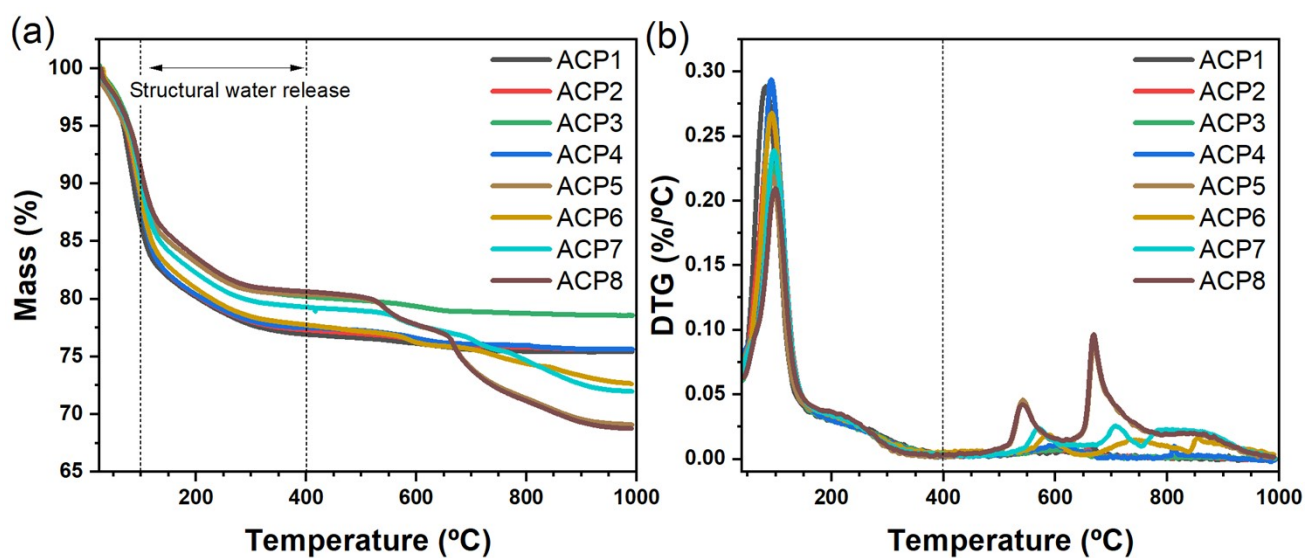

**Fig. S4.** (a) TGA curves for the as-synthesized ACP NPs, and (b) their corresponding DTG curves.

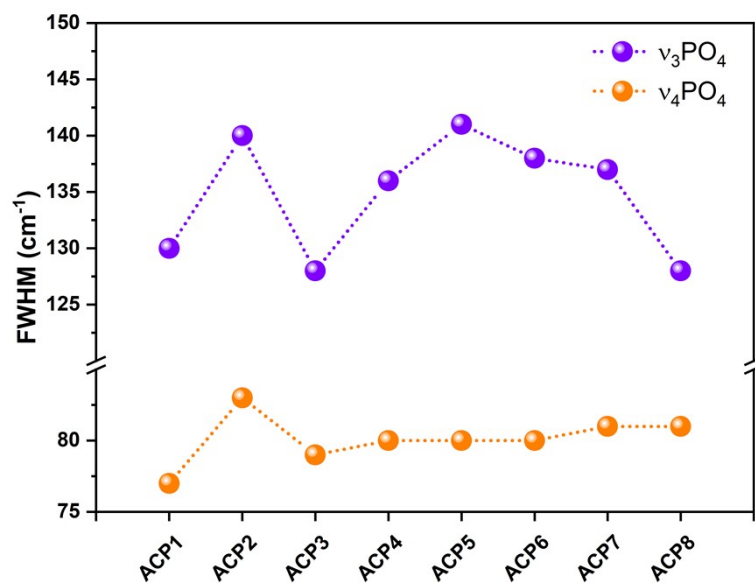

**Fig. S5.** FWHM of  $\nu_3, \nu_4\text{PO}_4$  bands calculated from the FTIR spectra of as-synthesized samples.

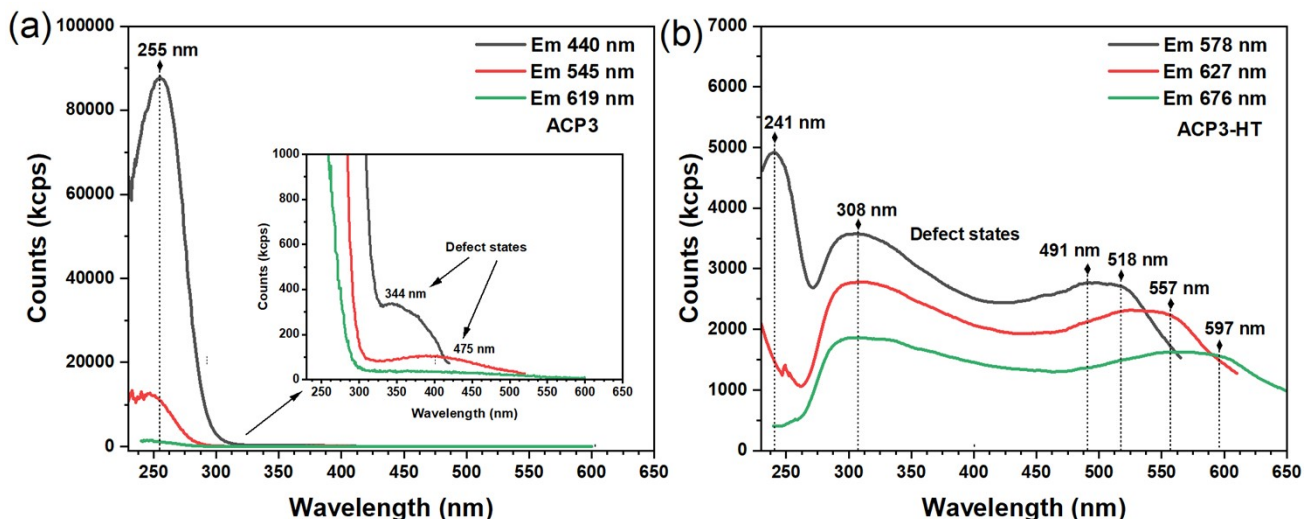

**Fig. S6.** Excitation spectra for (a) ACP3 NPs and (b) ACP3-HT NPs. The broad and intense bands at 255 nm and 241 nm for ACP3 and ACP3-HT samples, respectively, are attributed to transitions primarily involving band states [5]. The inset in (a) illustrates the defect states contributing to the observed PL emission for ACP3 NPs. Conversely, defect states are predominant in the excitation spectra of ACP3-HT and are distributed across the entire visible spectrum, facilitating the occurrence of PL emission even with low excitation wavelengths.

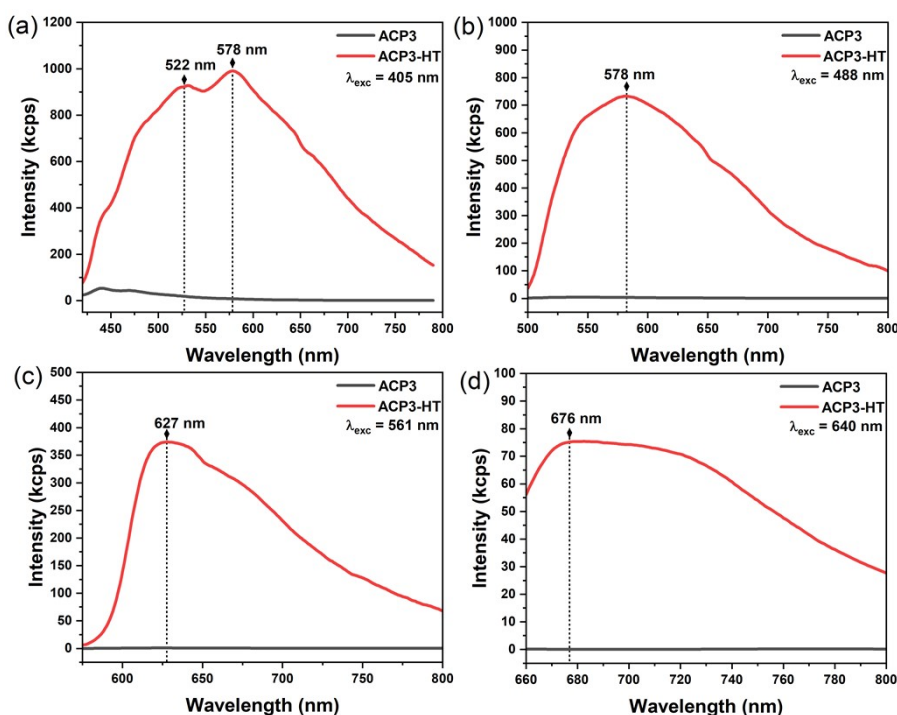

**Fig. S7.** PL emission spectra of ACP3 and ACP3-HT samples at distinct excitation wavelengths. (a)  $\lambda_{exc} = 405$  nm, (b)  $\lambda_{exc} = 488$  nm, (c)  $\lambda_{exc} = 561$  nm, and (d)  $\lambda_{exc} = 640$  nm.

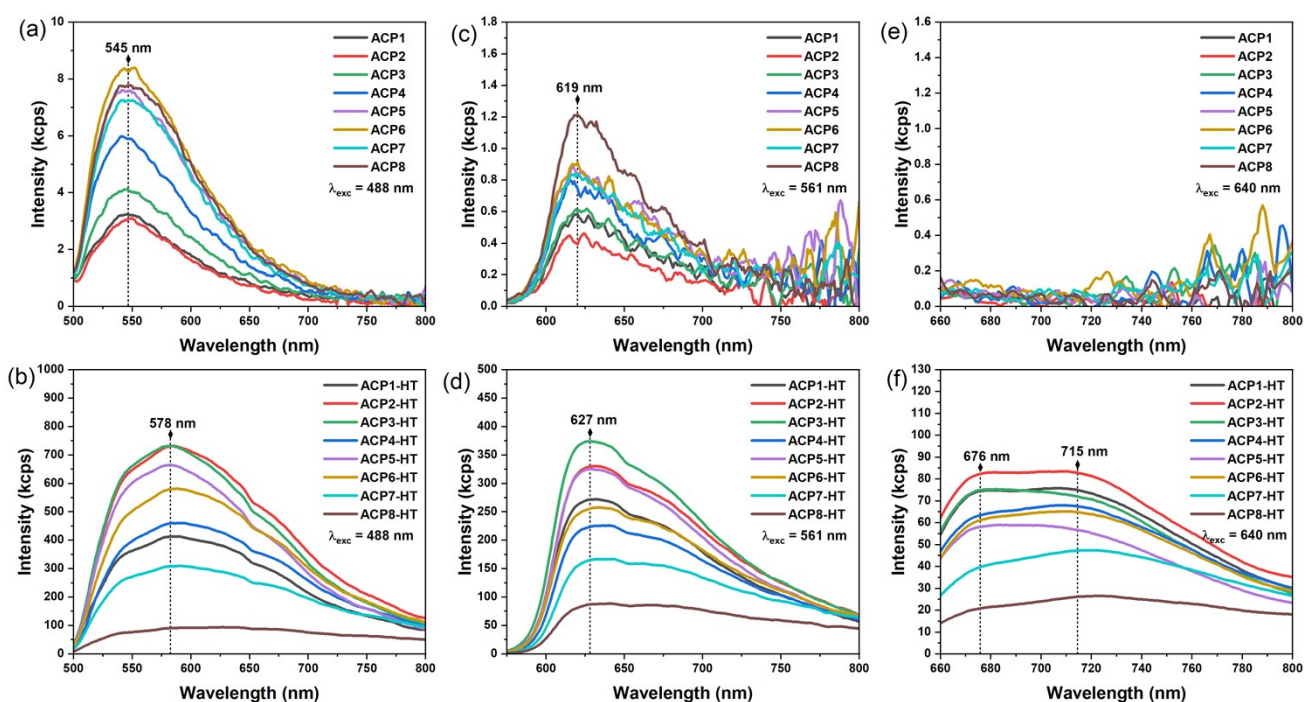

**Fig. S8.** PL emission spectra of all carbonated ACP NPs samples at distinct excitation wavelengths. (a,b)  $\lambda_{\text{exc}} = 488$  nm, (c,d)  $\lambda_{\text{exc}} = 561$  nm, and (e,f)  $\lambda_{\text{exc}} = 640$  nm.

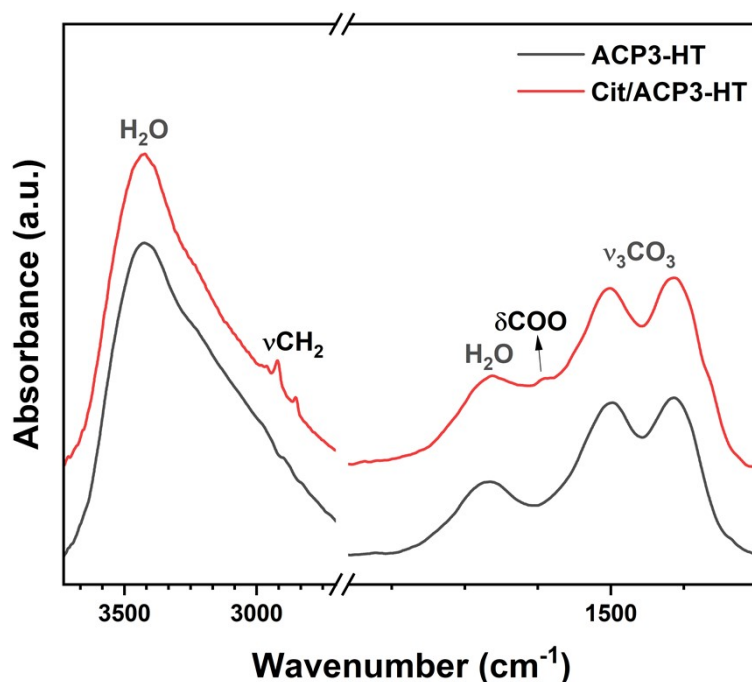

**Fig. S9.** FTIR spectra of ACP3-HT and Cit/ACP3-HT evidencing the successful functionalization of the NPs with citrate ions.

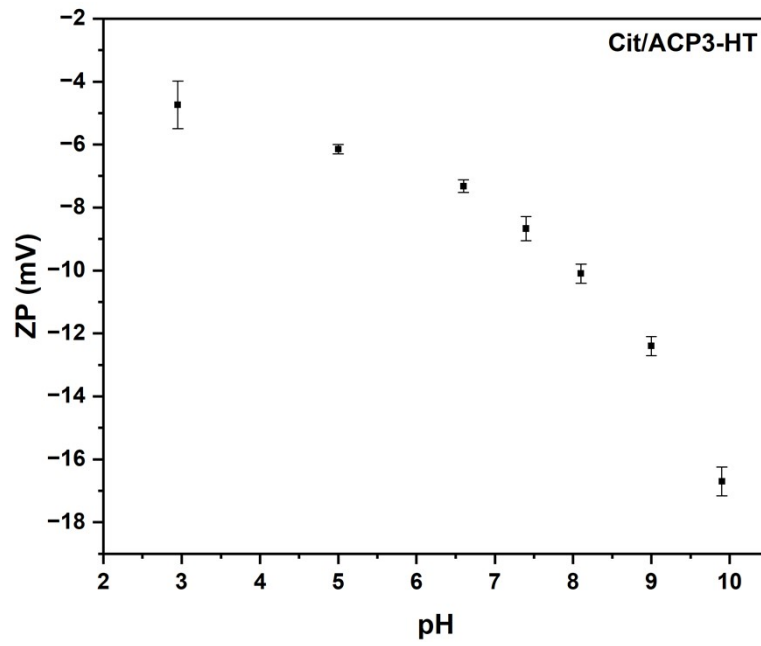

**Fig. S10.** Zeta potential of Cit/ACP3-HT NPs estimated at various pH values.

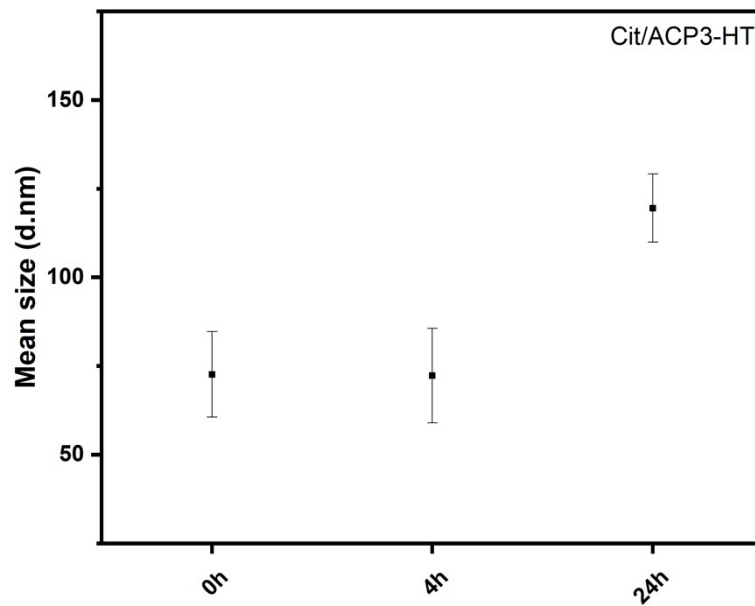

**Fig. S11.** Mean size of Cit/ACP3-HT NPs measured at different time intervals.

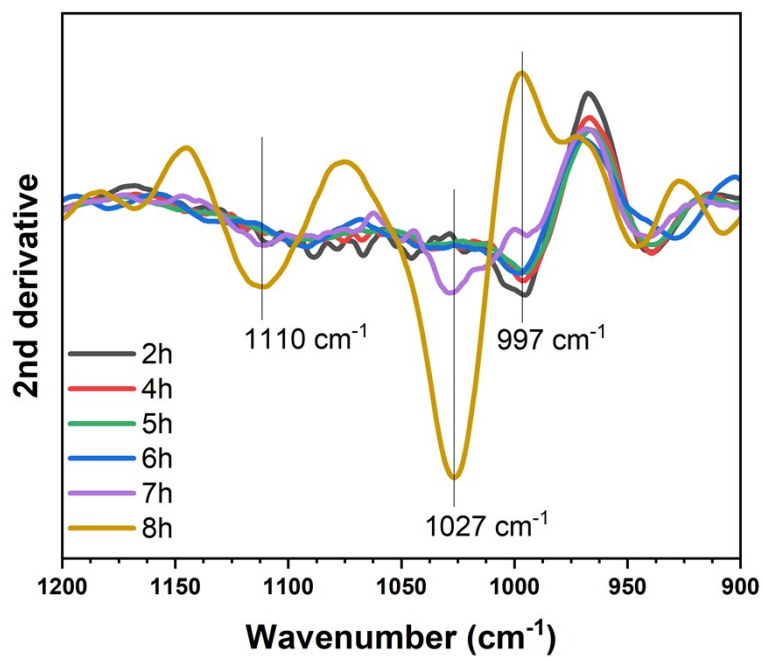

**Fig. S12.** Second derivate FTIR spectra for  $\nu_3\text{PO}_4$  modes of ACP3-HT NPs in water.

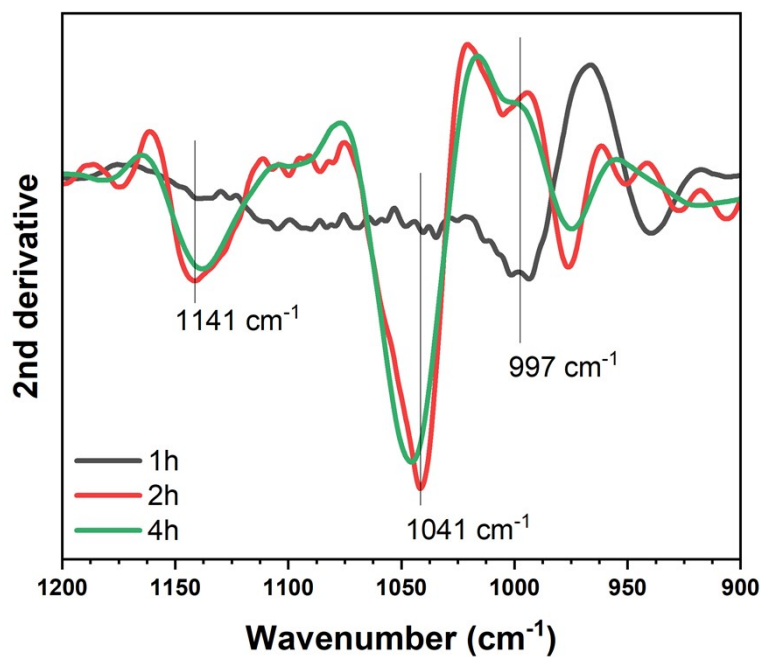

**Fig. S13.** Second derivate FTIR spectra for  $\nu_3\text{PO}_4$  modes of Cit/ACP3-HT NPs in PBS (pH 7.4).



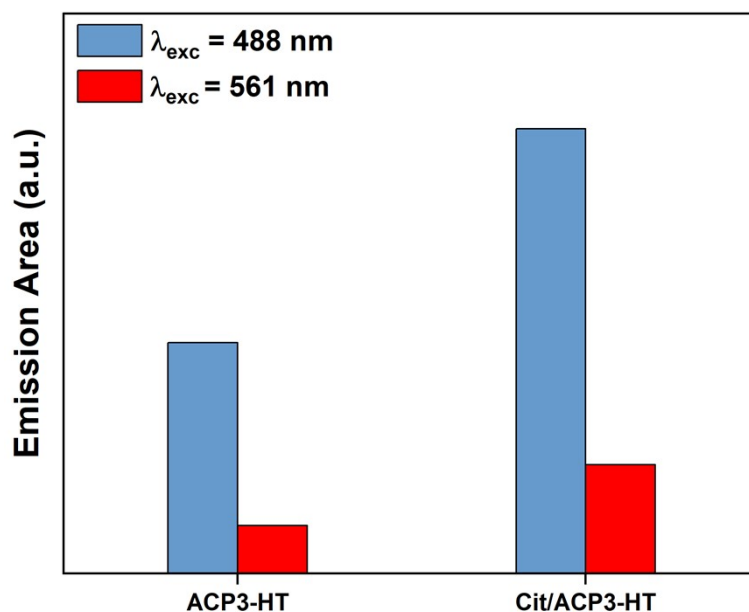

**Fig. S14.** Integrated emission area of ACP3-HT and Cit/ACP3-HT dispersed at  $1\text{mg}\cdot\text{mL}^{-1}$  in water.

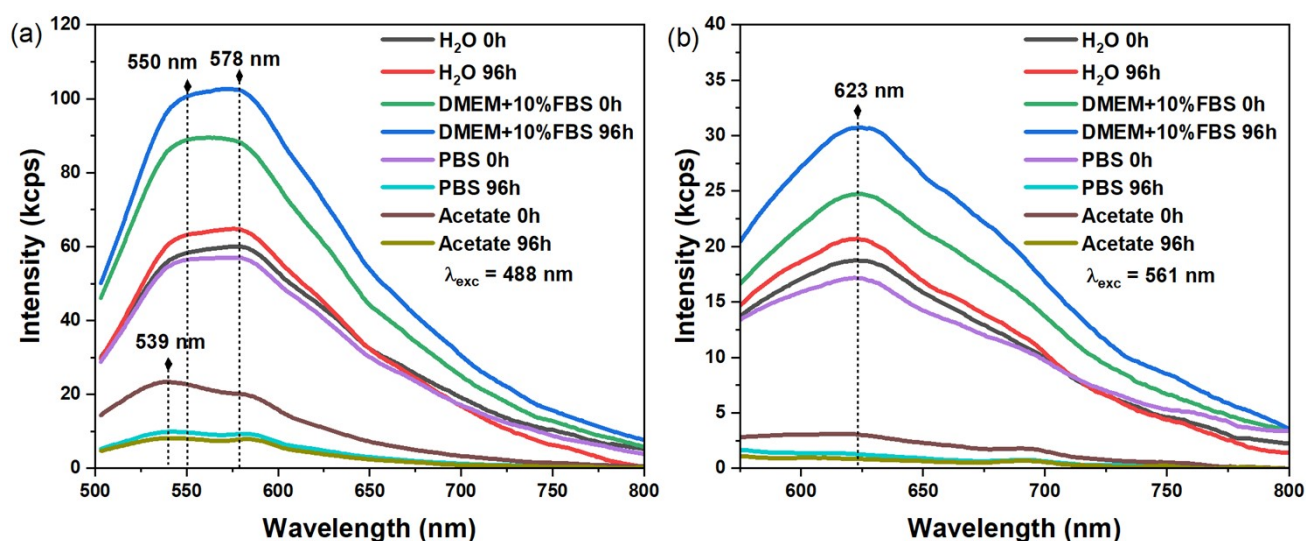

**Fig. S15.** PL emission spectra of Cit/ACP3-HT NPs in distinct aqueous environments and time intervals, measured at (a)  $\lambda_{exc} = 488 \text{ nm}$ , and (b)  $\lambda_{exc} = 561 \text{ nm}$ .

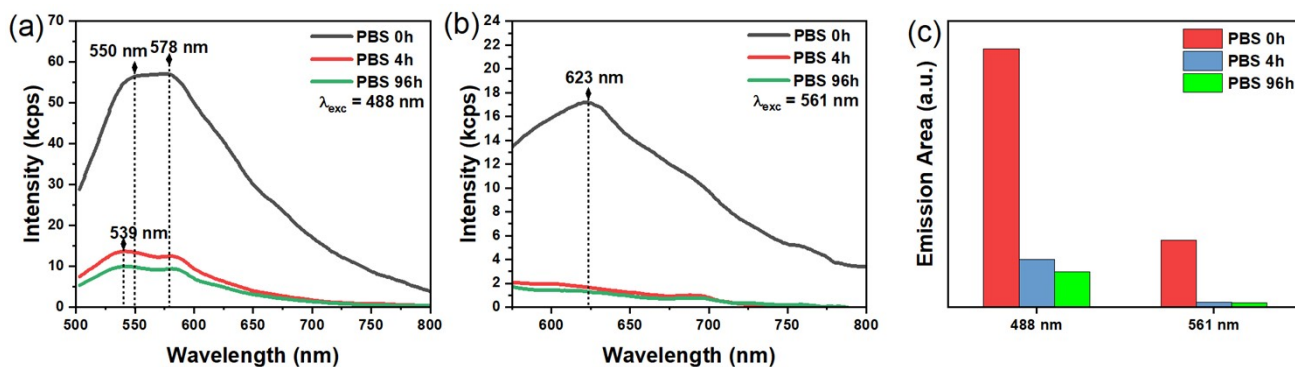

**Fig. S16.** (a,b) PL emission spectra of Cit/ACP3-HT NPs dispersed at  $1 \text{ mg}\cdot\text{mL}^{-1}$  in PBS (pH 7.4) at distinct time intervals, and (c) their corresponding integrated emission areas.

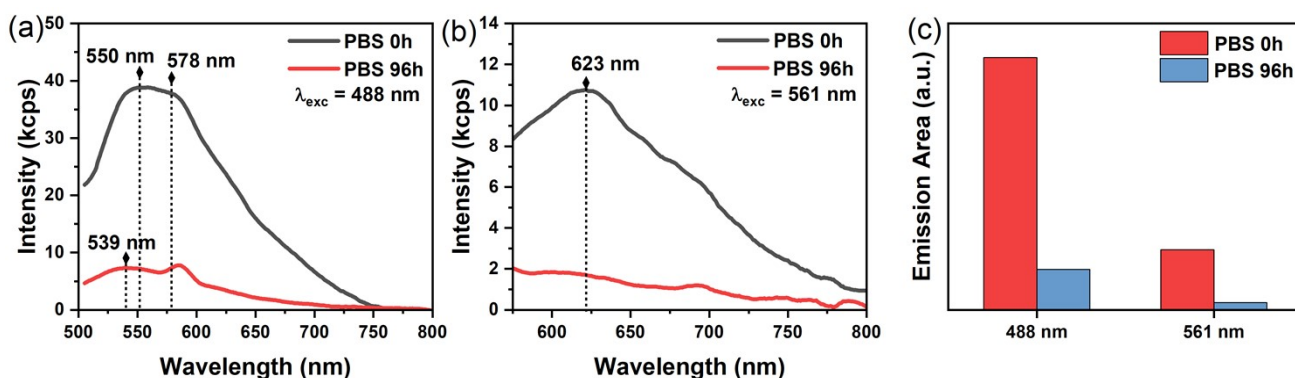

**Fig. S17.** (a,b) PL emission spectra of ACP3-HT NPs dispersed at  $1 \text{ mg}\cdot\text{mL}^{-1}$  in PBS (pH 7.4) at distinct time intervals, and (c) their corresponding integrated emission areas.

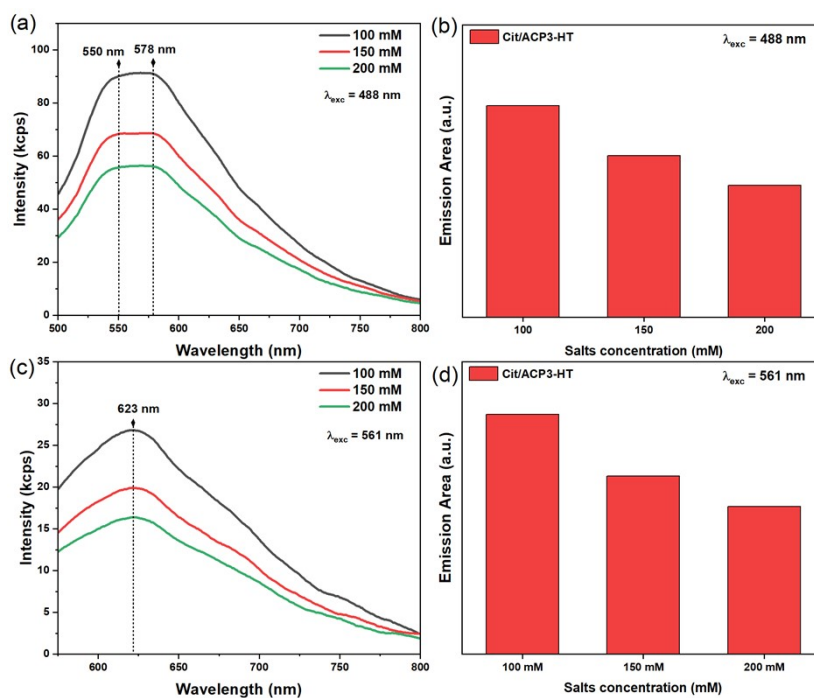

**Fig. S18.** (a,c) PL emission spectra of Cit/ACP3-HT NPs dispersed at  $1 \text{ mg}\cdot\text{mL}^{-1}$  in Tris-HCl buffer (pH 7.4) at distinct ionic strengths, and (b,d) their corresponding integrated emission areas.

## References

- [1] A. Grunenwald, C. Keyser, A.M. Sautereau, E. Crubézy, B. Ludes, C. Drouet, Revisiting carbonate quantification in apatite (bio)minerals: A validated FTIR methodology, *J Archaeol Sci* 49 (2014) 134–141. <https://doi.org/10.1016/j.jas.2014.05.004>.
- [2] M. Luginina, R. Orru, G. Cao, M. Luginina, D. Grossin, F. Brouillet, G. Chevallier, C. Thouron, C. Drouet, First successful stabilization of consolidated amorphous calcium phosphate (ACP) by cold sintering: Toward highly-resorbable reactive bioceramics, *J Mater Chem B* 8 (2020) 629–635. <https://doi.org/10.1039/c9tb02121c>.
- [3] C. Ortali, I. Julien, C. Drouet, E. Champion, Influence of carbonation on the low-temperature consolidation by Spark Plasma Sintering of carbonated calcium phosphate bioceramics, *Ceram Int* 46 (2020) 5799–5810. <https://doi.org/10.1016/j.ceramint.2019.11.030>.
- [4] J. Xu, I.S. Butler, D.F.R. Gilson, FT-Raman and high-pressure infrared spectroscopic studies of dicalcium phosphate dihydrate ( $\text{CaHPO}_4 \cdot 2\text{H}_2\text{O}$ ) and anhydrous dicalcium phosphate ( $\text{CaHPO}_4$ ), *Spectrochimica Acta Part A* 55 (1999) 2801–2809.
- [5] T.R. Machado, J.S. da Silva, R.R. Miranda, V. Zucolotto, M.S. Li, M.V.M. de Yuso, J.J. Guerrero-González, I.L.V. Rosa, M. Algarra, E. Longo, Amorphous calcium phosphate nanoparticles allow fingerprint detection via self-activated luminescence, *Chemical Engineering Journal* 443 (2022) 136443. <https://doi.org/10.1016/j.cej.2022.136443>.
